# Supplementary material
Source: publisher figshare collection journal article supplement (https://sage.figshare.com/ndownloader/files/19793405)
Supplement: Supplementary file 1 [file 19793405]

**Annex I:** Characteristics of the PVCs in use in the study

|          | <b>PVC</b>                                      | <b>Cathter Material</b> | <b>Integrated Extention Set?</b> | <b>Safety</b> | <b>Hospital</b>               |
|----------|-------------------------------------------------|-------------------------|----------------------------------|---------------|-------------------------------|
| <b>A</b> | Hospira Abbocath™                               | Polyurethane            | No                               | Yes           | Hospitals I , II              |
| <b>B</b> | BD Nexiva™ Closed IV Cathter System             | BD Vialon-Polyurethane  | Yes                              | Yes           | Hospitals I,II,III (Period 1) |
| <b>C</b> | BD Saf-T-Intima™                                | BD Vialon-Polyurethane  | Yes                              | Yes           | Hospital II                   |
| <b>D</b> | Smiths Medical DeltaVen® Closed System Catheter | Polyurethane            | Yes                              | Yes           | Hospital III (Period 2)       |

**Annex II:** PVC failure among different hospitals

| <b><i>PVC failure</i></b>        | <b>Hospital I</b> |          | <b>Hospital II</b> |          | <b>Hospital III</b> |          | <b>Total</b>    |                 |
|----------------------------------|-------------------|----------|--------------------|----------|---------------------|----------|-----------------|-----------------|
| <b><i>Period</i></b>             | Period 1          | Period 2 | Period 1           | Period 2 | Period 1            | Period 2 | <b>Period 1</b> | <b>Period 2</b> |
| <b><i>Clinical failure</i></b>   | 8.9%              | 7.8%     | 13.6%              | 7.4%     | 16.1%               | 15.7%    | <b>12.8%</b>    | <b>10.3%</b>    |
| <b><i>Mechanical failure</i></b> | 4.1%              | 3.5%     | 18.2%              | 15.6%    | 17.1%               | 16.6%    | <b>13.1%</b>    | <b>11.9%</b>    |

**Annex III:** Descriptive analysis of PVCs in the “hospital control”.

|                                         | <b>Hospital control</b> |          | <b>Total</b> |
|-----------------------------------------|-------------------------|----------|--------------|
|                                         | Period 1                | Period 2 |              |
| <b>Number of patients (N=)</b>          | 265                     | 154      | <b>419</b>   |
| <b>Age (mean)</b>                       | 68.9                    | 69.1     | <b>69</b>    |
| <b>Gender (%Male)</b>                   | 61%                     | 67%      | <b>64%</b>   |
| <b>Charlson score(mean)</b>             | 2.9                     | 2.4      | <b>2.65</b>  |
| <b><i>Rate of PVC failure</i></b>       | 20%                     | 16%      | <b>18%</b>   |
| <b>Mean days of hospital stay(days)</b> | 11.5                    | 11.8     | <b>11.6</b>  |
| <b>Mean days of ward stay(days)</b>     | 11.7                    | 11.9     | <b>11.8</b>  |
